# Supplementary material for: Highly compact nanochannel thin films with exceptional thermal conductivity and water pumping for efficient solar steam generation
Source: Royal Society of Chemistry journal article supplement (doi:10.1039/d0ta02921a), 2020-01-01
Supplement: d0ta02921a1.pdf [file d0ta02921a1.pdf]

## Supporting Information

### Highly Compact Nano-Channelled Thin Films with Exceptional Thermal Conductivity and Water Pumping for Efficient Solar Steam Generation

*Weiwei Wei<sup>a,†</sup>, Qingbao Guan<sup>b,†</sup>, Chuanting You<sup>c</sup>, Jianyong Yu<sup>c</sup>, Zhanhui Yuan<sup>c</sup>,  
Peirong Qiang<sup>a</sup>, Chenxin Zhou<sup>a</sup>, Yi Ren<sup>d</sup>, Zhengwei You<sup>b\*</sup>, Fan Zhang<sup>a\*</sup>*

<sup>a</sup>School of Chemistry and Chemical Engineering, State key Laboratory of metal matrix composites, Shanghai Electrochemical Energy Devices Research Center, Shanghai Jiao Tong University, Dongchan Road 800, 200240 Shanghai, P. R. China

E-mail: fan-zhang@sjtu.edu.cn (F. Z.)

<sup>b</sup>State Key Laboratory for Modification of Chemical Fibers and Polymer Materials, Shanghai Belt and Road Joint Laboratory of Advanced Fiber and Low-dimension Materials (Donghua University), College of Materials Science and Engineering, Donghua University, Shanghai 201620. China.

E-mail: zyou@dhu.edu.cn (Z. Y.)

<sup>c</sup>College of Materials Science and Engineering, Fujian Agriculture and Forestry University, P. R. China

<sup>d</sup>School of Physical Science and Technology, Shanghai Tech University, 393 Middle Huaxia Road, Shanghai 20210, China

<sup>†</sup>These authors contributed equally to this work.

---

## Table of Contents

|                                |    |
|--------------------------------|----|
| 1. Experimental section.....   | 3  |
| 2. Thermodynamic Analysis..... | 5  |
| 3. Supplementary Figures.....  | 6  |
| 4. Supplementary Tables .....  | 23 |

---

## 1 Experimental section:

*Composite films preparation:* The graphene oxide (GO) was prepared via typical Hummers method, and then reduced by hydrazine hydrate to obtain reduced graphene oxide (RGO). In a typical procedure, a solution of CNFs (1wt % in water) was mixed with freshly prepared RGO powder to prepare CNFs/RGO mixed slurry. Afterwards, this CNFs/RGO slurry was fully stirred for 10 min to ensure a completely contact between RGO and CNFs, and then ultrasonically vibricated for 2 hours. It is very crucial that the processes of mixing and ultrasonically have be carried out under 80 °C in order to enhance the thermal motion of RGO sheet and CNFs fiber. Such performance was repeated for at least 5 times. A homogenous solution was formed. To obtain a more smooth film, we used battery diaphragm (celgard 3501) to replaced traditional (tetrafluoride ethylene) (PTFE) membrane, and slowly filtrated to a composite film with a diameter of 4 cm. Furthermore, the film was naturally dried under ambient conditions for more than one day. The thin-film sample (donated as **CNF@RGO-80**) was peeled readily from the polymer filter. By changing the ratio of RGO/CNFs in 60/40, 70/30 80/20 or 90/10 wt%, a series of GRO/CNFs composite thin films termed as CNF@RGO-60, 70, 80, 90, respectively, were fabricated under the same performance.

*The fabrication of solar steam generation device:* The composite films of **CNF@RGO-*n*** were cut to a circular flat with a vapor surface area of 5.3066 cm<sup>2</sup>. The polystyrene foam (PSF) was also cut to a circular column with surface of 5.3066 cm<sup>2</sup> and thickness of 1 cm. This circular column was encased by bibulous paper and foist into a plastic cuvette that was filled with deionized water. The deionized water was pumped up by bibulous paper and soaked the surface of bibulous. The circular flat of **CNF@RGO-*n*** was put on the surface of bibulous paper and soaked by capillarity. This assembly is considered as a simple device for solar steam generation, which utilized the bibulous paper to supply water for the generation surface of **CNF@RGO-*n***. The PSF was used to strut the vapor generation surface meanwhile hinder the transportation of

---

photothermal energy.

*Solar Steam Generation Efficiency Measurement:* A standard solar simulator (Newport oriel 69907) was used to measure the steam generation efficiency. The solar steam generation device was placed under the standard simulator with different light intensities (1 kW m<sup>-2</sup>/1sun, 2 kW m<sup>-2</sup>/2 suns, 3 kW m<sup>-2</sup>/3 suns) when testing. A k-type thermocouple was used to monitor the upper and low surface temperature under illumination. A calibrated electronic balance was used to measure the mass change during evaporation.

*Optical Measurement:* optical measure was tested by a UV-vis spectrometer (Lambda 950) from 200 to 2000 nm (PerkinElmer, USA). The sample for test was circular flat with a diameter of 4cm. A bibulous paper was soaked by water and contacted with the circular flat of **CNF@RGO-*n*** to prepare wet sample.

*Thermal conductivity measurement:* Laser flash method represents a non-contact transient method to measure thermal diffusivity of materials. During testing, an instantaneous laser pulse was used to heat one side of the film, and the response of temperature on the other side was recorded by detector. The Netzsch laser flash apparatus (LFA467) was used for thermal diffusivity measurement. The thermal conductivity  $k$  (W m<sup>-1</sup> K<sup>-1</sup>) of the samples was then calculated by following formula:

$$k = \alpha \rho C_p \quad (2)$$

where  $\alpha$  (mm<sup>2</sup> s<sup>-1</sup>) is the measured thermal diffusivity along a particular direction,  $C_p$  (J g<sup>-1</sup> K<sup>-1</sup>) is the heat capacity, and  $\rho$  (g cm<sup>-3</sup>) is the density. The needed heat capacity,  $C_p$ , can also be acquired by comparing with standard references Inconel 600 in parallel with thermal diffusivity measurement. The in-plane and crossplane samples were acquired by cutting the wood in different directions.

*Adsorption/desorption isothermal measurement:* Nitrogen adsorption/desorption isothermal was performed with a Micromeritics ASAP 2020 HD Analyzer at 77 K. Pore

size distribution was estimated based on BJH model. Vapor adsorption/desorption isothermal was performed with a Volume Method Vapor Sorption Analyzer (BSD-PSV) at 25 °C.

*The crystallinity of CNFs measurement:*

The crystallinity of CNFs was also evaluated by the equation:

$$X_c(\%) = (A_c / (A_c + A_a)) \times 100 \quad (3)$$

where  $A_c$  is the total crystalline area, and  $A_a$  is the total amorphous area of the deconvoluted XRD pattern after a subtraction of the background spectra.

## 2 Thermodynamic Analysis

The distribution of solar energy should follow this equation:

$$E_{Solar} = E_{vap} + E_{Los} \quad (1)$$

where  $E_{Solar}$  is the solar energy, the  $E_{Los}$  is the energy consumed by heat loss, the  $E_{vap}$  is the energy consumed by evaporation which can be written as:

$$E_{vap} = m_1 \times [h_v + (T_2 - T_1) \times C_L] \quad (2)$$

where  $h_v$  is the liquid-vapor phase change (2256 J g<sup>-1</sup>), and the  $C_L$  is heat capacity of liquid water (4.2 J g<sup>-1</sup> at 25-100 °C) (*Adv. Funct. Mater.*, **2018**, 28, 1803266),  $T_1$  is original temperature of block water,  $T_2$  is the stable temperature,  $m_1$  is quantity of evaporating water which can be written as:

$$m_1 = \frac{E_{vap}}{h_v + (T_2 - T_1) \times C_L} \quad (3)$$

The  $E_{Los}$  can be calculated as:

$$E_{Los} = Q_{cond} + Q_W \quad (4)$$

where  $Q_W$  is the heat loss by heating the excessive water,  $Q_{cond}$  is the heat conductive loss from the heat exchange through surface and the heat absorption of skeleton of sample. All of samples exhibit very low heat capacity ( $C_{skeleton}$ ) (the heat capacities of **CNF@RGO-60, 90** are around 0.82 J g<sup>-1</sup> K<sup>-1</sup> and 0.72 J g<sup>-1</sup> K<sup>-1</sup>, respectively, as depicted in the original vision, page 3, line 7), therefore, the heat absorption from the materials skeletons is always ignored in the previous reports (*Adv. Funct. Mater.*, **2018**, 28, 1803266; *Carbon*, **2019**, 149, 556; *Adv. Mater.*, **2015**, 27, 4302). It is worth noting that the stable temperatures of film's upper surface and bottom surface in each sample are the same (Figure S16). These phenomena are probably due to their unique highly compact porous structure and excellent thermal conductivities of 139 W m<sup>-1</sup> K<sup>-1</sup> ~ 614 W m<sup>-1</sup> K<sup>-1</sup>, comparable to the recently reported graphene based highly thermal

conductivity materials (*ACS Appl. Mater. Interfaces*, **2011**, *3*, 1325; *Adv. Funct. Mater.*, **2017**, *27*, 1700240). Such high thermal conductivity for such kinds of highly compact porous thin films could allow for quickly transmitting heat over the whole materials. On the other hand, regard to the relatively low the surface areas as compared with their inner specific areas according to BET analysis, the heat losing through their surfaces are too small to be considered in calculation. Thus,  $Q_{cond}$  could be ignored in the final calculation.  $m_2$  can be calculated in the following steps:

$$Q_w = (T_2 - T_1) \times m_2 \times C_L \quad (5)$$

where  $m_2$  is the quantity of excessive water. Substituting Eq. (4) into Eq. (5),  $E_{Los}$  and  $m_2$  are calculated as:

$$E_{Los} = Q_{cond} + (T_2 - T_1) \times m_2 \times C_L \quad (6)$$

$$m_2 = \frac{E_{Los}}{(T_2 - T_1) \times C_L} \quad (7)$$

Finally, we can calculate the amount of water pumping and loading relative to the photo-thermal conversion as:

$$M = \frac{E_{Los}}{(T_2 - T_1) \times C_L} + \frac{E_{vap}}{h_v} + (T_2 - T_1) \times C_L \quad (8)$$

Where M is total quantity of water pumping and loading.

For **CNF@RGO-60**, the evaporation efficiency ( $\eta$ ) is 64% under 1 sun, which means 64 percentage of  $E_{solar}$  is used to evaporation and 36 percentage of  $E_{solar}$  is lost, thus the M of **CNF@RGO-60** can be written as:

$$M_{60} = E_{solar} \times \left( \frac{0.36}{\Delta T_{60} \times C_L} + \frac{0.64}{h_v} + \Delta T_{60} \times C_L \right) \quad (9)$$

$\Delta T_{60}$  is difference of the stable temperature (32.8 °C) and the original temperature of block water (~20.4 °C) according to temperature changing curve of **CNF@RGO-60** (Figure S15).

For **CNF@RGO-90**, the evaporation efficiency ( $\eta$ ) is 83% under 1 sun, which means 83 percentage of  $E_{solar}$  is used to evaporation and 17 percentage of  $E_{solar}$  is lost, thus the M of **CNF@RGO-90** can be written as:

$$M_{90} = E_{solar} \times \left( \frac{0.17}{\Delta T_{90} \times C_L} + \frac{0.83}{h_v} + \Delta T_{90} \times C_L \right) \quad (10)$$

$\Delta T_{90}$  is the difference of the stable temperature (37.1 °C) and the original temperature of block water (~21.3 °C) according to temperature changing curve of **CNF@RGO-90** (Figure S15).

According to Eq. (9) and (10), the ratio of  $M_{90}/M_{60}$  is shown as:

$$\frac{M_{90}}{M_{60}} = \frac{(0.17h_v + \Delta T_{90} \times C_L) (\Delta T_{60} \times C_L) (h_v + \Delta T_{60} \times C_L)}{(0.36h_v + \Delta T_{60} \times C_L) (\Delta T_{90} \times C_L) (h_v + \Delta T_{90} \times C_L)} \quad (11)$$

Accordingly, the ratio of  $M_{90}$  to  $M_{60}$  could be evaluated as around 0.39, demonstrating that the total water pumping/loading of **CNF@RGO-60** is much large

than that of CNF@RGO-90.

### 3 Supplementary Figures

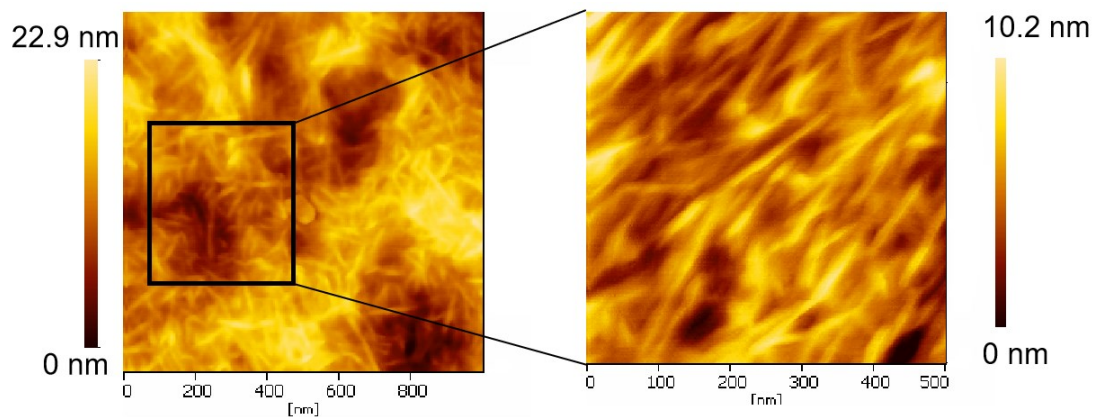

**Figure S1.** Atomic force microscopy (AFM) images of CNFs used in this work.

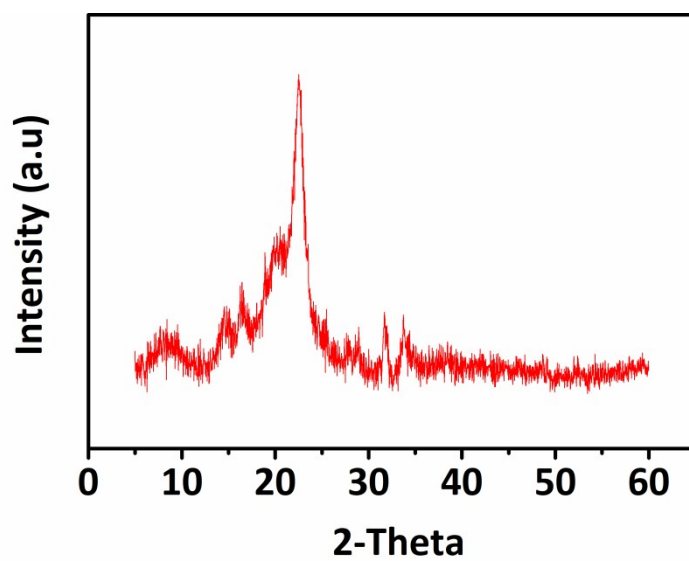

**Figure S2.** Powder X-ray diffractometer (PXRD) pattern of CNFs.

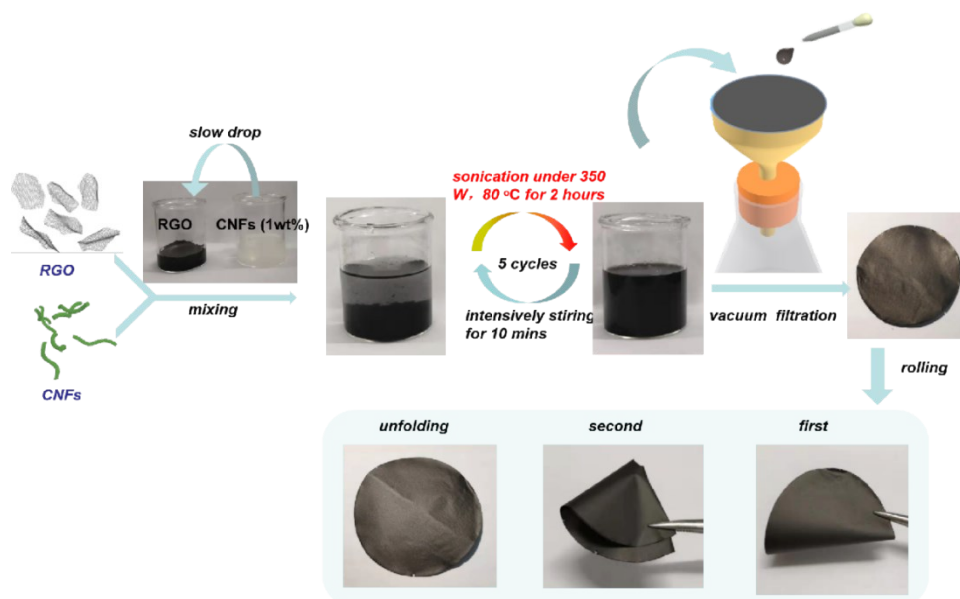

**Figure S3.** Preparation of CNF@RGO-*n* thin films and the photographs of mechanical performances.

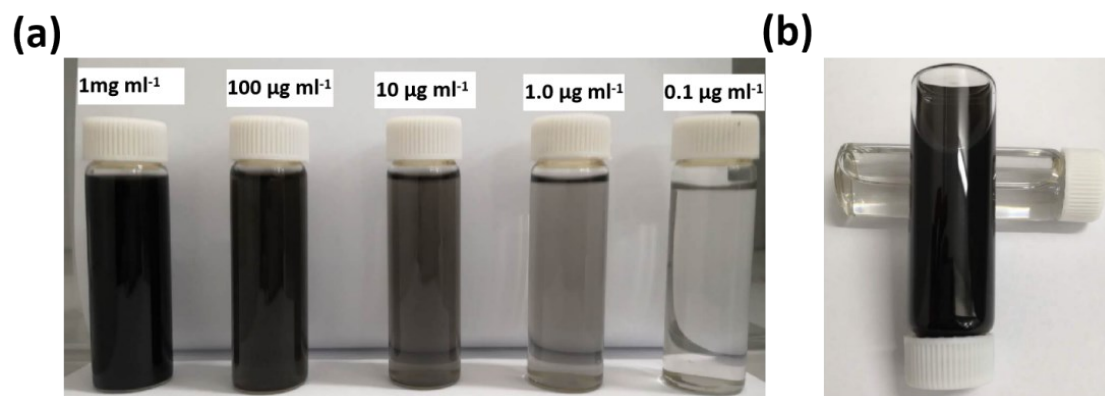

**Figure S4.** Digital images of (a) CNF/RGO dispersion with different content of RGO (b) CNF/RGO dispersion of 1 mg ml<sup>-1</sup> after 48 hours.



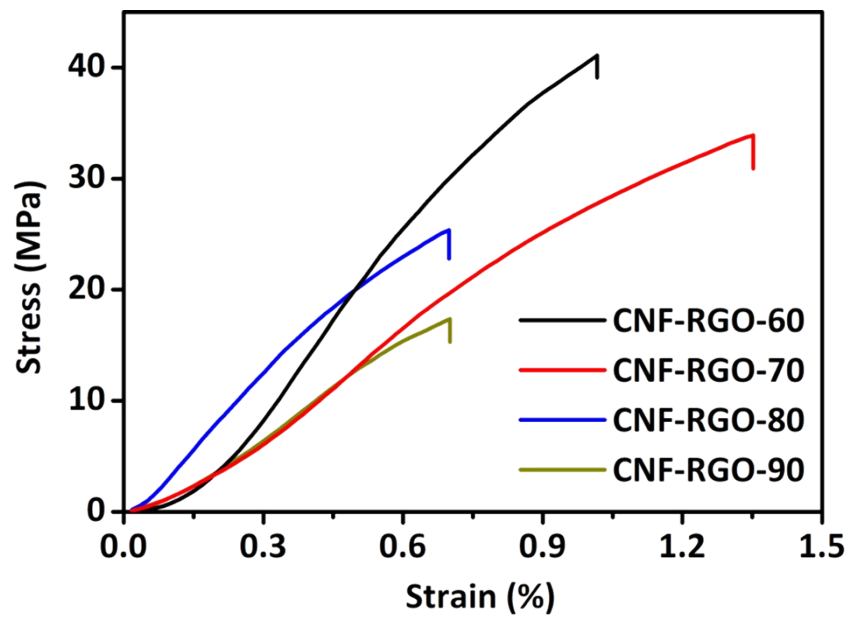

Figure S5. Typical stress-strain curves of CNF-RGO-*n*.

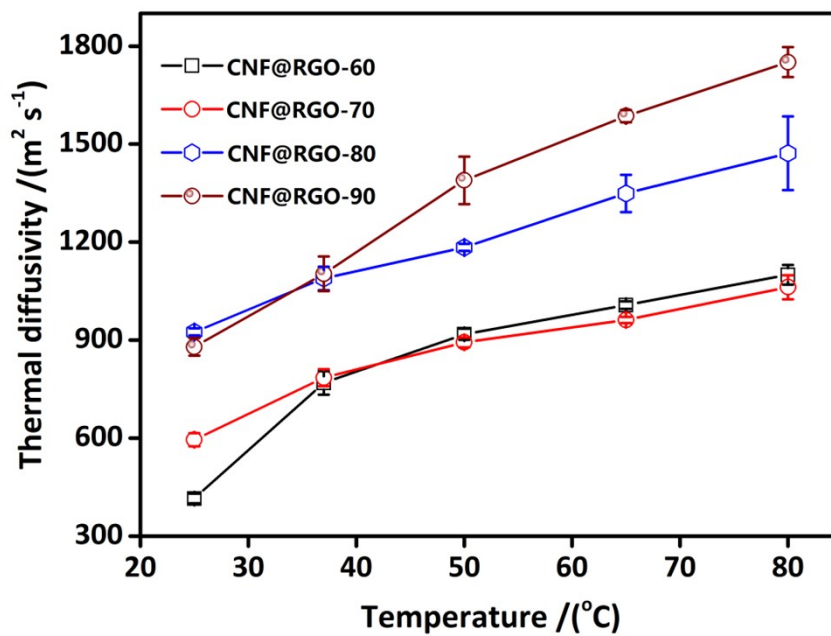

Figure S6. Thermal diffusion coefficient of CNF@RGO-*n* under 25~80 °C.

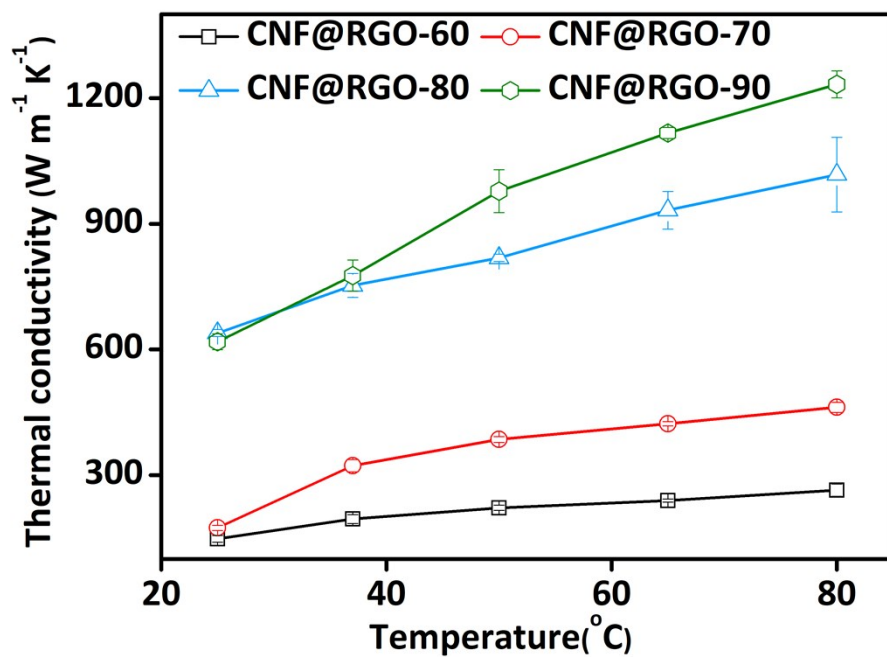

Figure S7. Thermal conductivity of CNF@RGO-*n* under 25~80 °C.

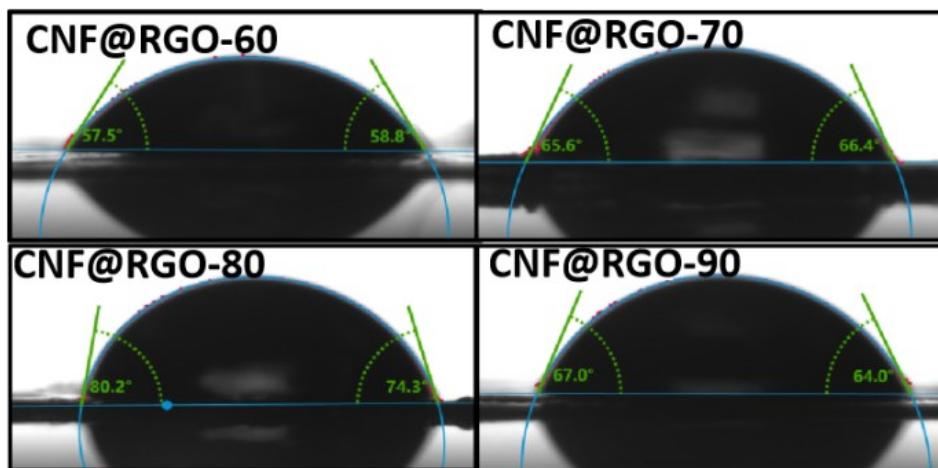

Figure S8. Wettability of sprayed-on the surface of CNF@RGO-*n*.

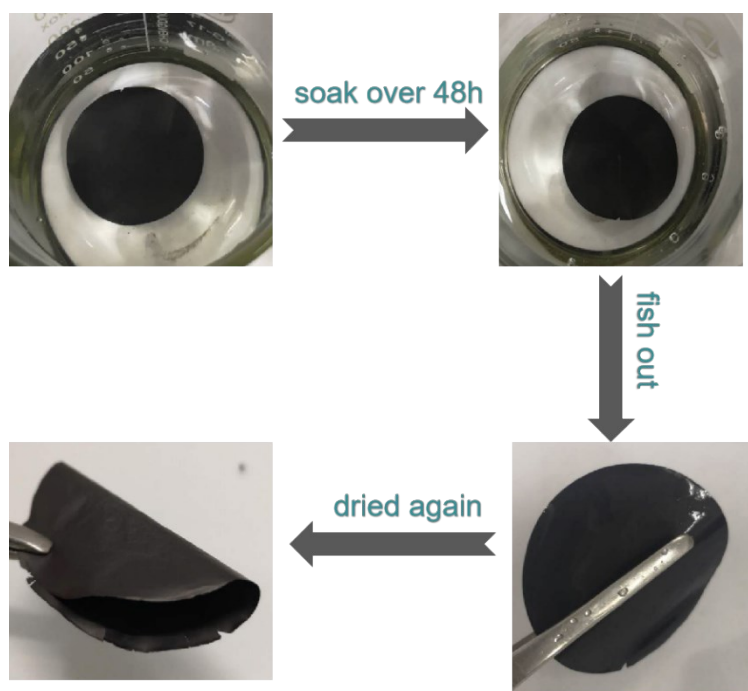

**Figure S9.** The Digital photographs of CNF@RGO-90 were soaked in water for 48 hours and dried again under 60 °C.

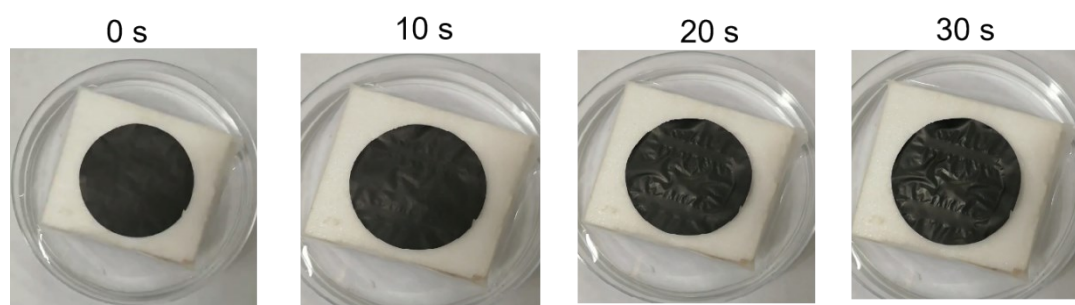

**Figure S10.** Digital photographs for monitoring the wetting process of CNF@RGO-90 with a substrate of airlaid paper, which were floated on water.

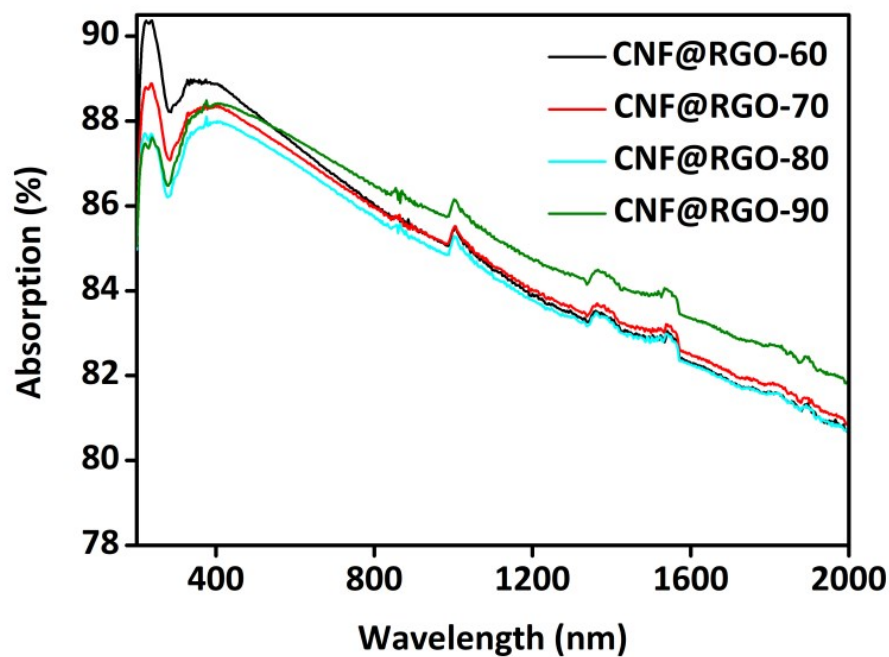

Figure S11. The Absorbance comparison of CNF@RGO- $n$  under 200-2000nm.

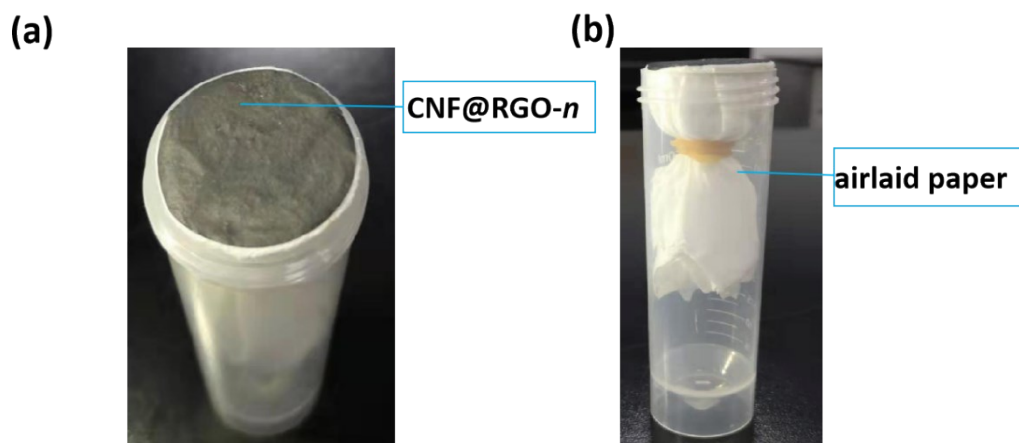

Figure S12. The digital photograph of solar-steam generator: (a) top-view photograph. (b) side-face photograph.

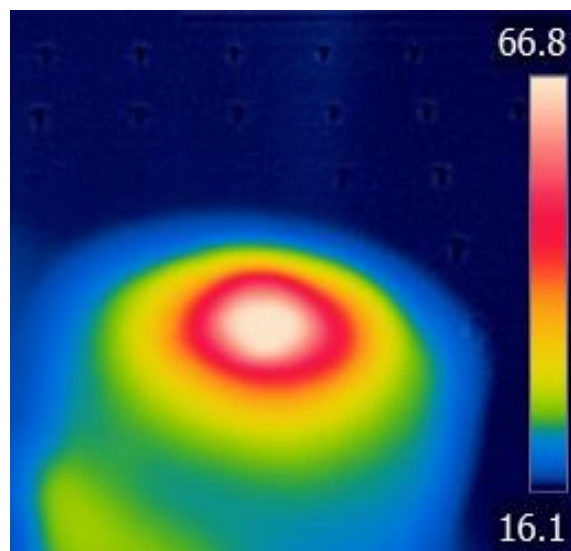

**Figure S13.** The illustration of distribution between CNF@RGO-90 and airlaid paper under 3 suns after 600 s.

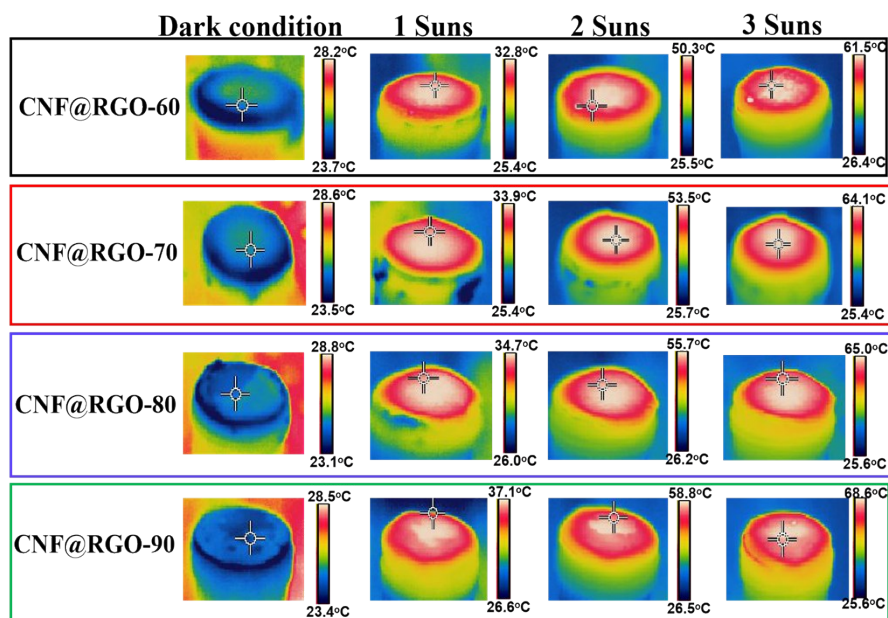

**Figure S14** Infrared photo of CNF@RGO-60, 70, 80, 90 under dark condition and the Infrared photos of 600 S under 1, 2, 3 suns respectively.

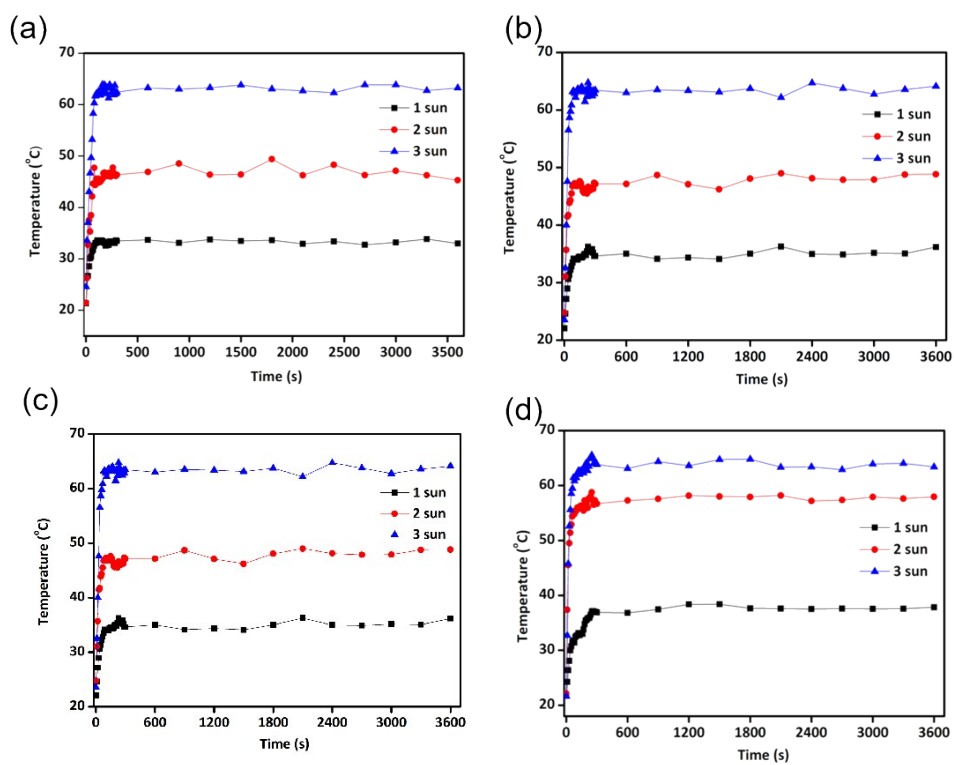

Figure S15 The temperatures of upper surface for CNF@RGO-60, 70, 80, 90 under 1, 2, 3suns.

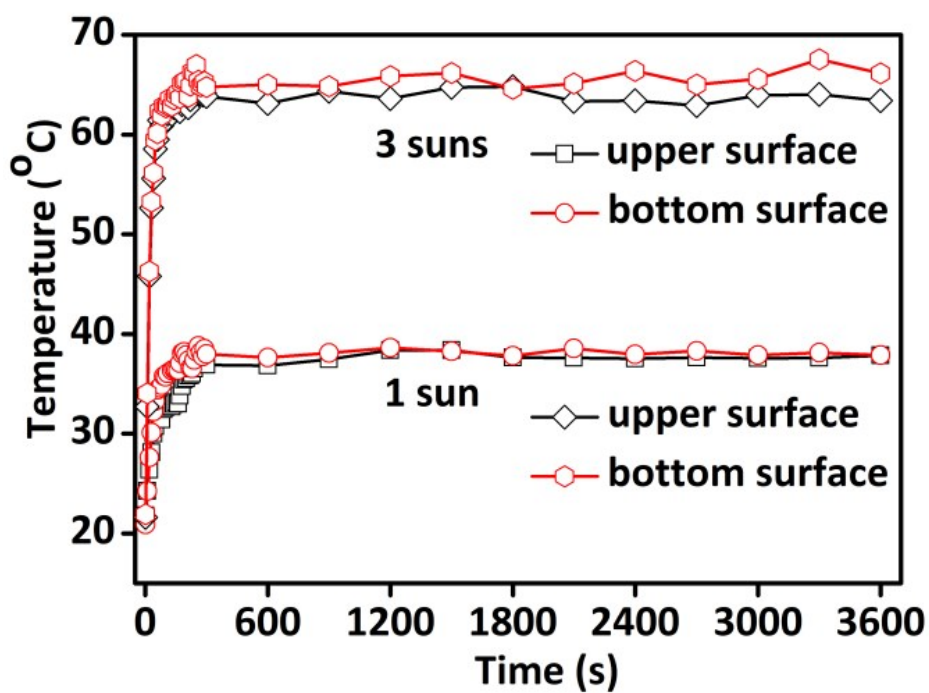

Figure S16. The temperature of upper surface and bottom surface for CNF@RGO-90 under 1 sun and 3 suns.



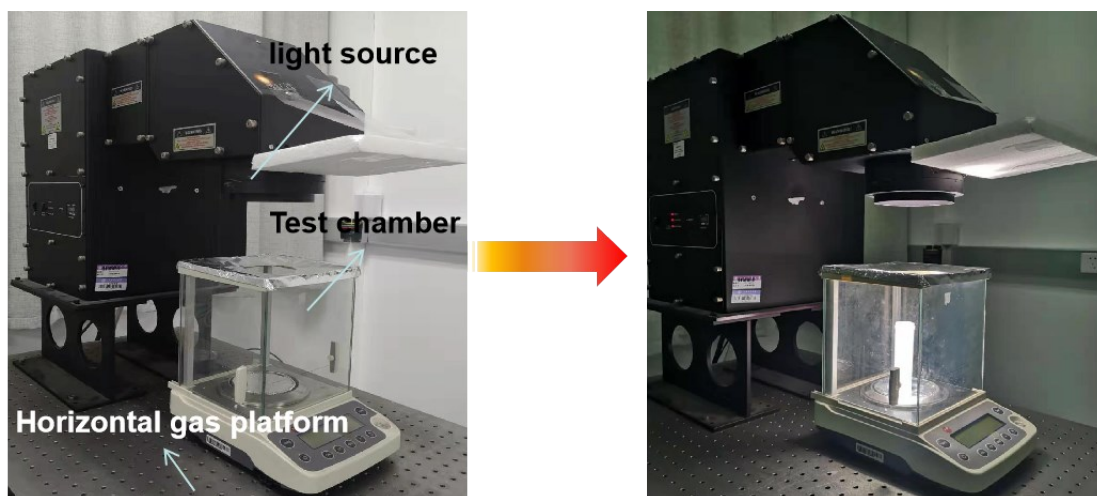

**Figure S17.** The experimental system of photo-thermal conversion and evaporation rate.

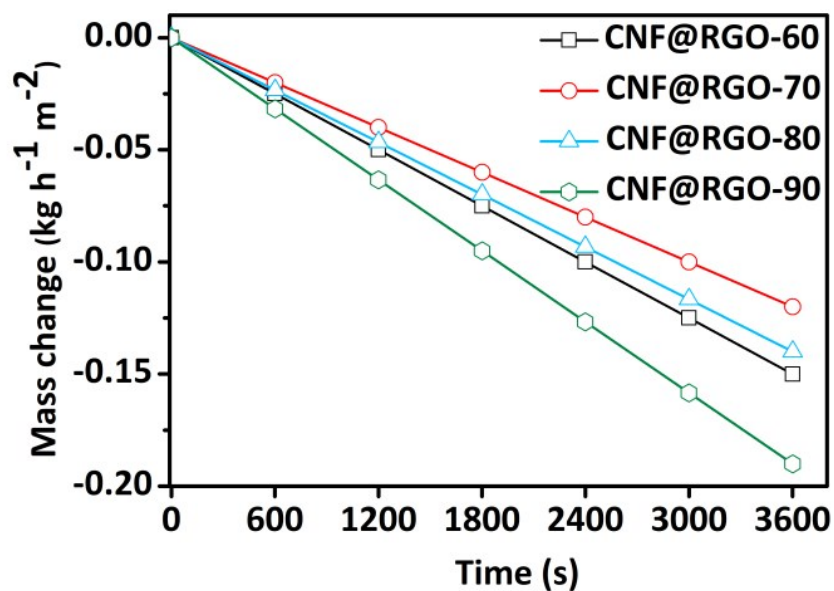

**Figure S18.** The dark evaporation rate of CNF@RGO-*n* at ~25 °C and a relative humidity of 50-55%.

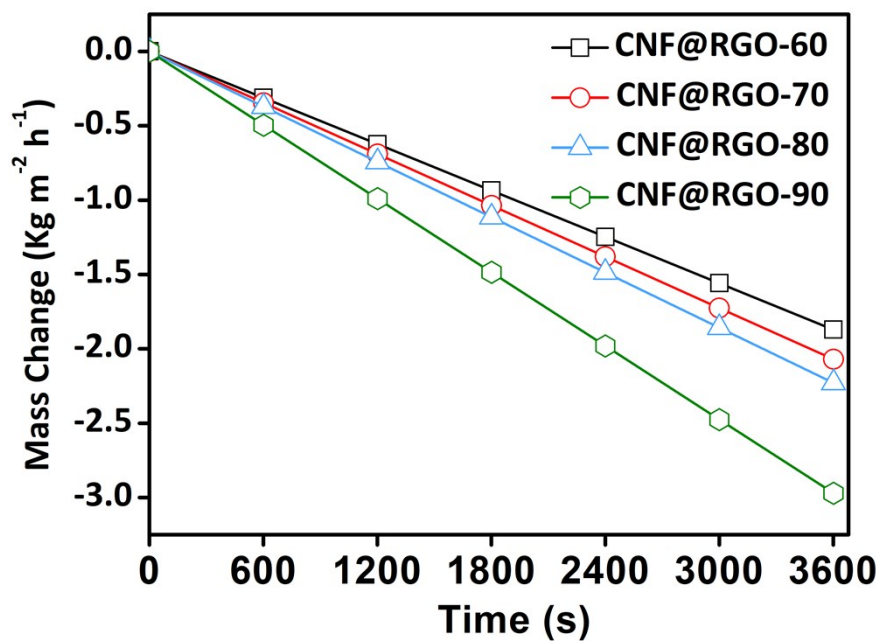

**Figure S19.** The evaporation rate of CNF@RGO-*n* under 2 suns at ~25 °C and a relative humidity of 50-55%.

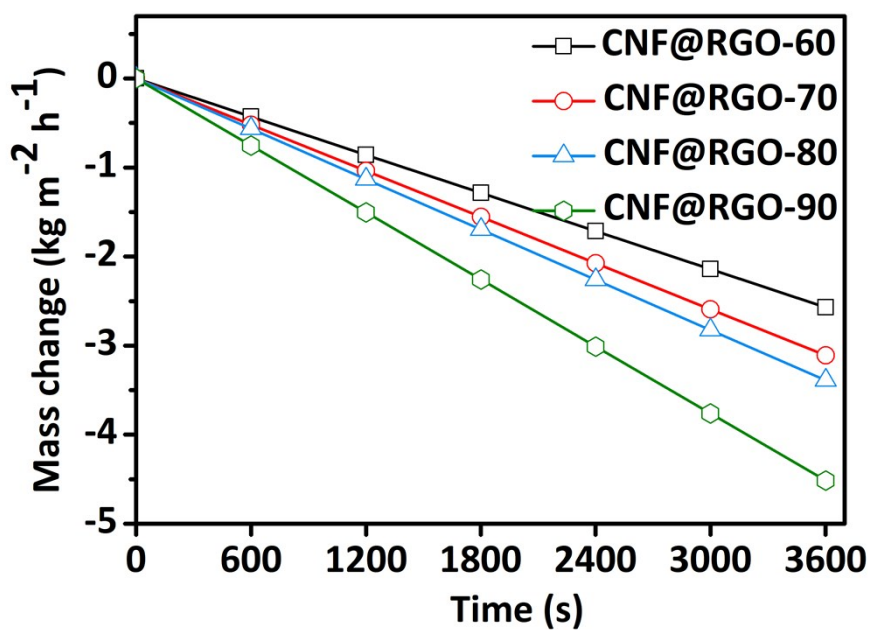

**Figure S20.** The evaporation rate of CNF@RGO-*n* under 3 suns at ~25 °C and a relative humidity of 50-55%.



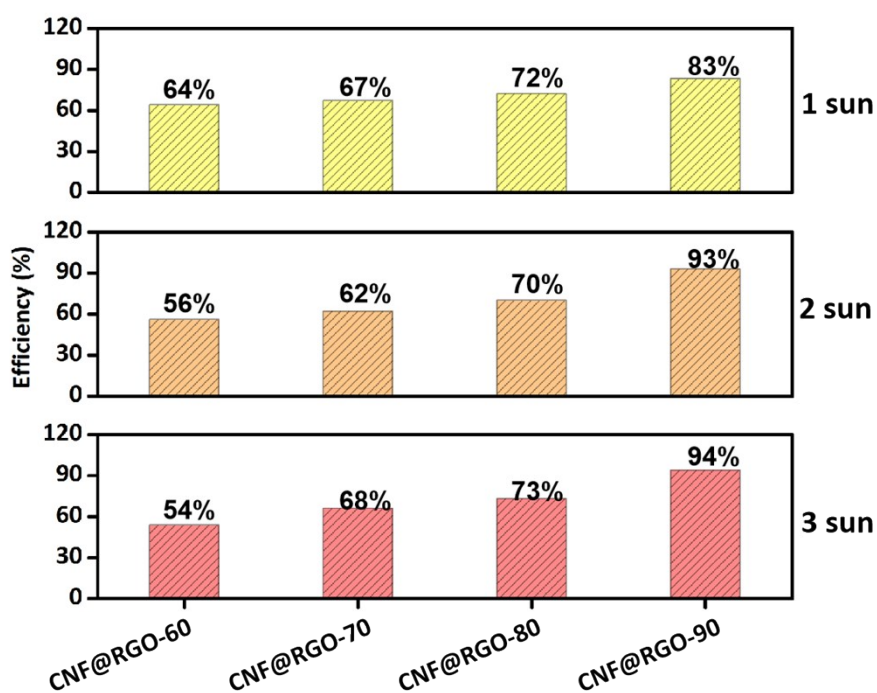

Figure S21 The efficiency of CNF@RGO-60, 70, 80, 90 under 1, 2, 3 sun.

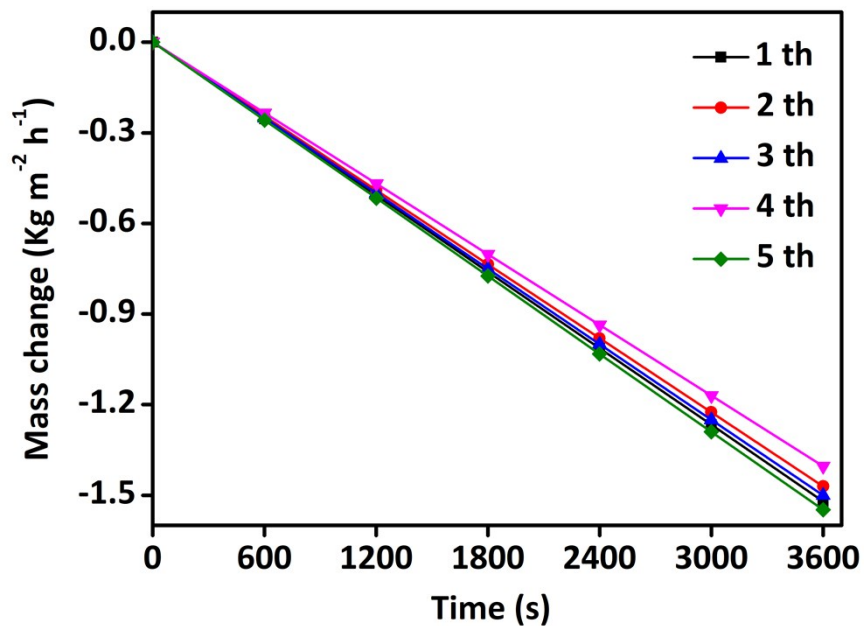

Figure S22. The evaporation rate of 5 cycles of CNF@RGO-90 under 1sun at ~25 °C and a relative humidity of 50-55%.

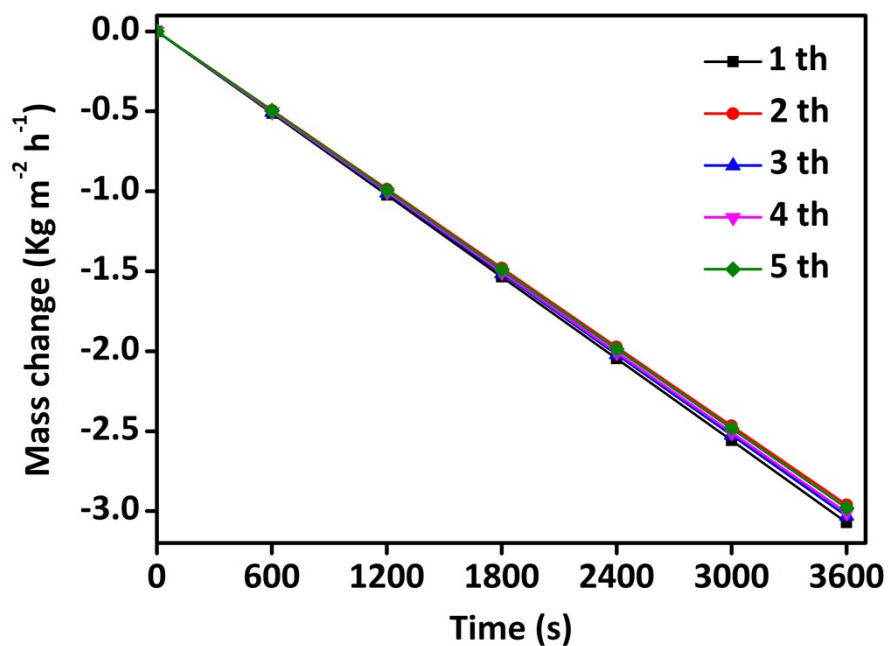

**Figure S23.** The evaporation rate of 5 cycles of **CNF@RGO-90** under 2suns at ~25 °C and a relative humidity of 50-55%.

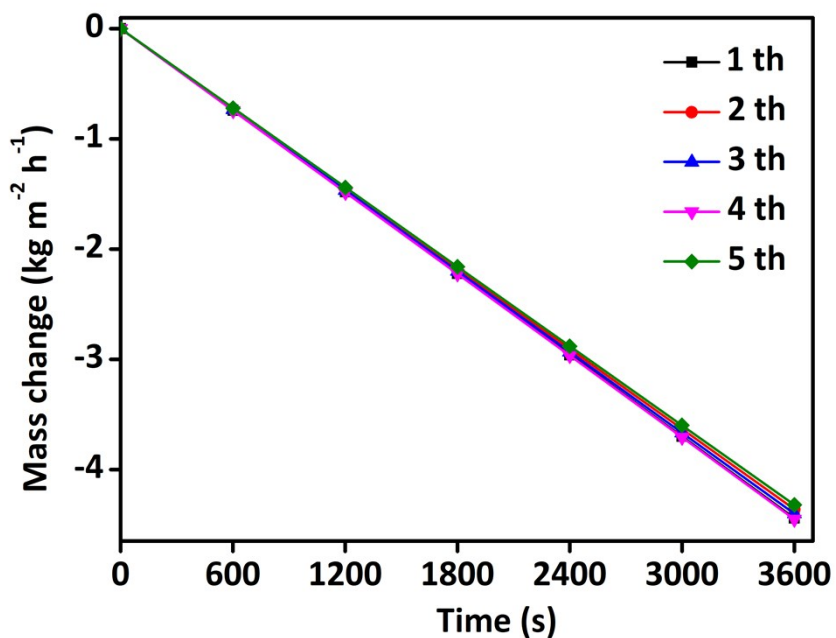

**Figure S24.** The evaporation rate of 5 cycles of **CNF@RGO-90** under 3 suns at ~25 °C and a relative humidity of 50-55%.

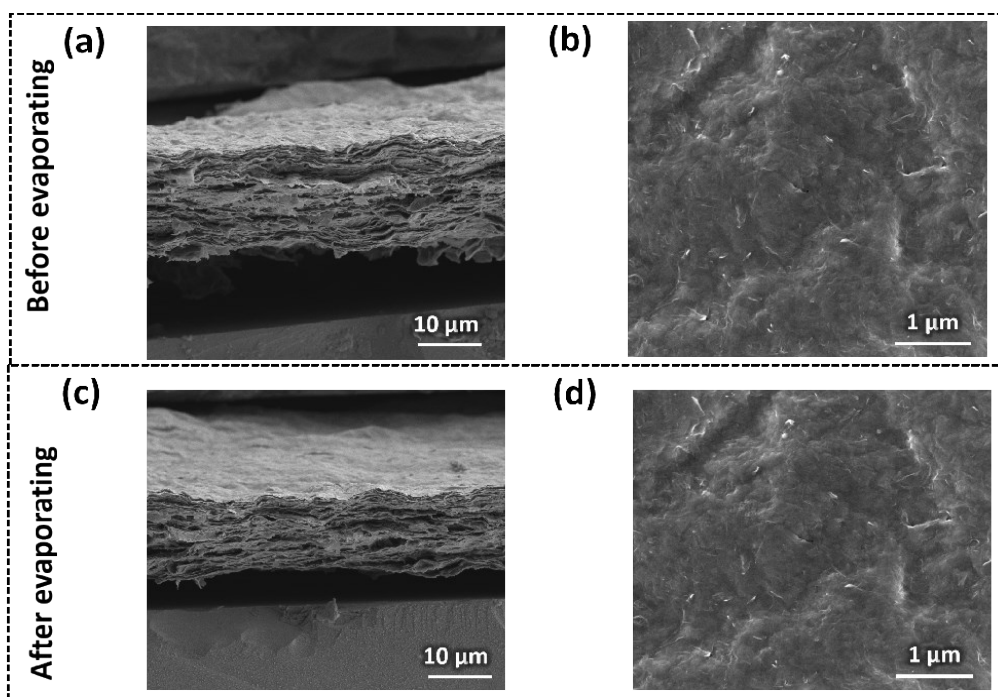

**Figure S25.** The SEM images of **CNF@RGO-60**. (a,b) The images of cross-section and surface before evaporation. (c,d) The images of cross-section and surface after evaporating under 1 sun over 5 hours.

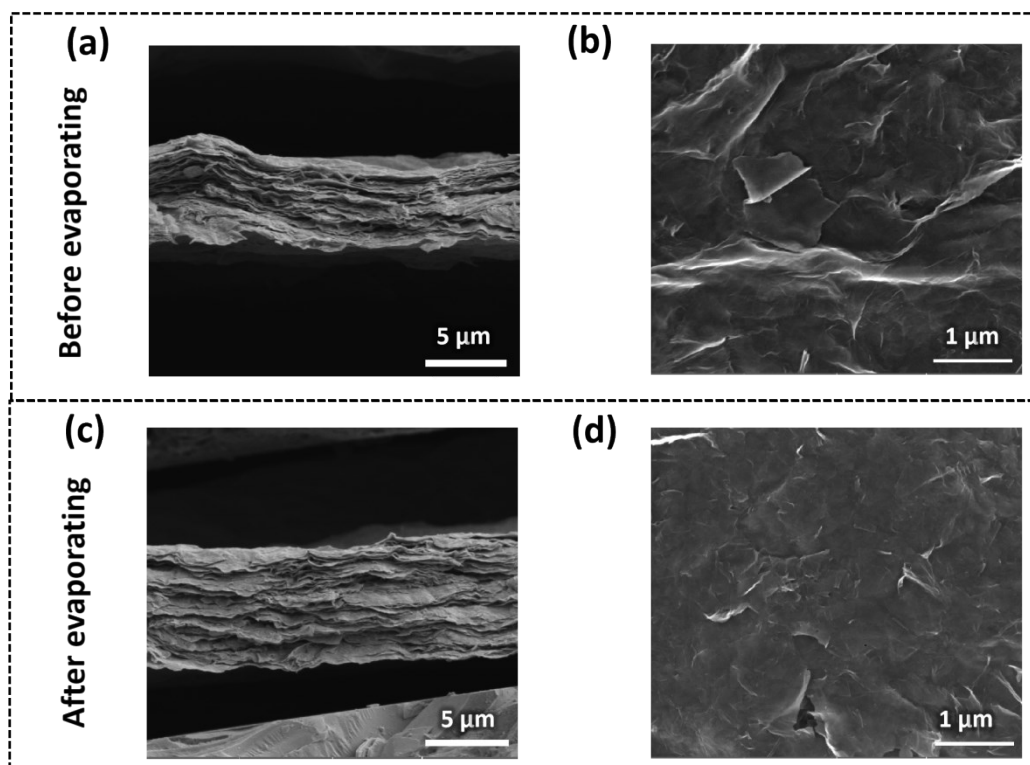

**Figure S26.** The SEM images of **CNF@RGO-70**. (a,b) The images of cross-section and surface before evaporation. (c,d) The images of cross-section and surface after evaporating under 1 sun over 5 hours.

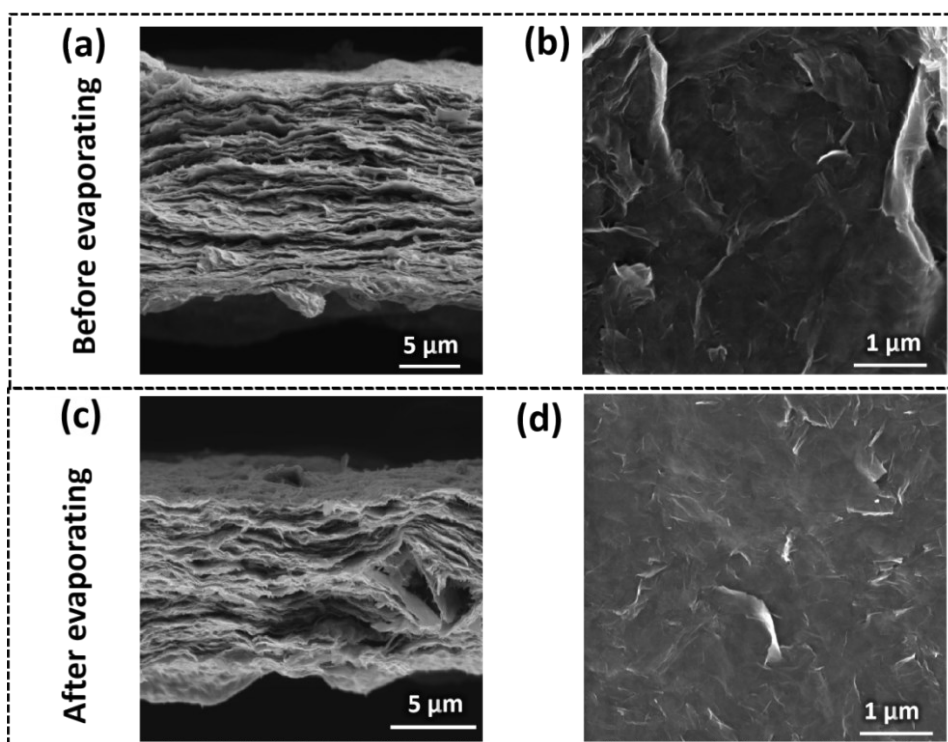

**Figure S27.** The SEM images of **CNF@RGO-80**. (a,b) The images of cross-section and surface before evaporation. (c,d) The images of cross-section and surface after evaporating under 1 sun over 5 hours.

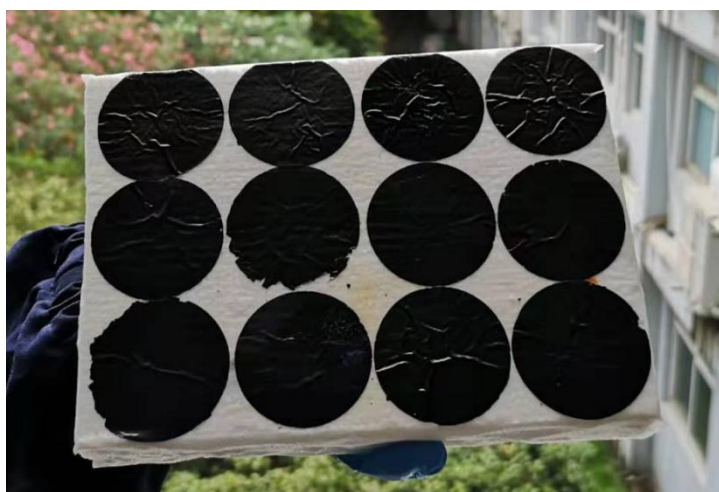

**Figure S28.** The photograph of an amplified solar steam-generator integrated with 12 unites (total area of **CNF@RGO-90**:  $\sim 144 \text{ m}^2$ ) for evaporating.

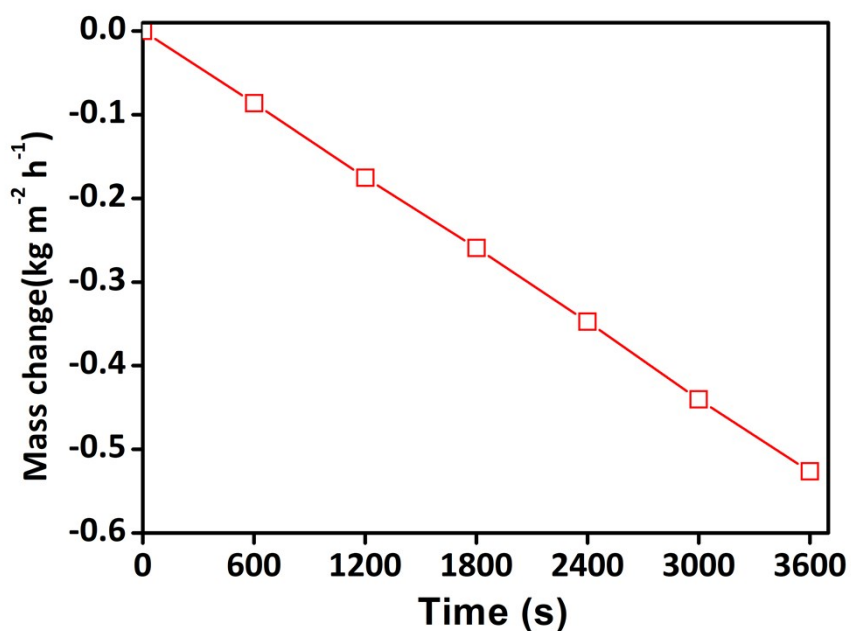

**Figure S29.** Evaporation rate of CNF@RGO-n under  $700 \text{ kW m}^{-2}$ , under an ambient temperature of  $25 \text{ }^\circ\text{C}$  and relative humidity of 50-55%.

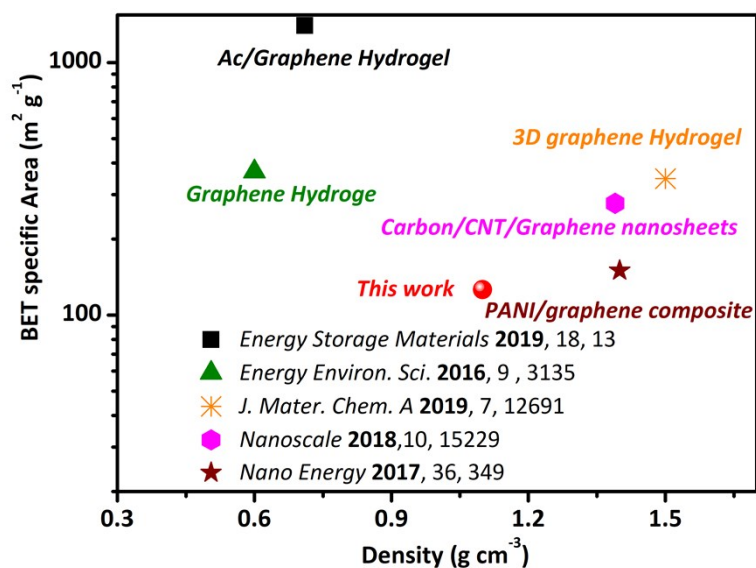

**Figure S30.** The density and BET specific area of the as-prepared CNF@RGO-90 and the previously reported graphene-based composites.

**Table S1.** Solar steam generation performances of different materials. The energy conversion efficiency, and the evaporation rates of various photo-thermal conversion materials under 1 sun.

| Sample                                                   | Energy conversion (%) | Evaporation rate (kg <sup>-1</sup> m <sup>-2</sup> h <sup>-1</sup> ) | Ref.                                                             |
|----------------------------------------------------------|-----------------------|----------------------------------------------------------------------|------------------------------------------------------------------|
| CNT coated wood                                          | 65                    | 0.9                                                                  | <i>Adv. Mater.</i> <b>2017</b> , 29, 1701756                     |
| Porous N-doped graphene                                  | 80                    | 1.5                                                                  | <i>Adv. Mater.</i> <b>2015</b> , 27, 430                         |
| Black Ag particle                                        | 95                    | 1.4                                                                  | <i>Nano Lett.</i> <b>2019</b> , 19, 1400-407                     |
| Hierarchical graphene foam                               | 91                    | 1.4                                                                  | <i>Adv. Mater.</i> <b>2017</b> , 29, 1702590                     |
| CNT-modified filter paper                                | 75                    | 1.15                                                                 | <i>Energy Environ. Sci.</i> <b>2017</b> , 10, 1923               |
| Graphene coated wood                                     | 80                    | 1.15                                                                 | <i>Adv. Funct. Mater.</i> <b>2018</b> , 28, 1707134              |
| Flamed-treated wood                                      | 72                    | 1.05                                                                 | <i>ACS Appl. Mater. Interfaces</i> <b>2017</b> , 9, 15052        |
| Carbonized rice straw                                    | 75                    | 1.2                                                                  | <i>ACS Appl. Mater. Interfaces</i> <b>2019</b> , 11, 10672-10679 |
| CNT-macroporous silica                                   | 82                    | 1.31                                                                 | <i>ACS Sustainable Chem. Eng.</i> <b>2016</b> , 4, 1223          |
| Nitrogen-enriched carbon sponge                          | 85                    | 1.31                                                                 | <i>Adv. Energy Mater.</i> <b>2018</b> , 8, 1702149               |
| Carbonized daikon                                        | 85                    | 1.57                                                                 | <i>Adv. Energy Mater.</i> <b>2018</b> , 8, 1702149.              |
| Hollow-CNTs-Aerogels                                     | 86                    | 1.44                                                                 | <i>Energy Mater Sol. Cells</i> <b>2019</b> , 191, 83.            |
| PPy membrane                                             | 82                    | 1.41                                                                 | <i>Adv. Energy Mater.</i> <b>2019</b> , 9, 1802158               |
| Carbon nanotubes (CNTs)/wood membrane                    | 65                    | 0.95                                                                 | <i>Adv. Energy Mater.</i> <b>2018</b> , 8, 1702884               |
| multilayer PPy nanosheets                                | 92                    | 1.38                                                                 | <i>Adv. Mater.</i> <b>2019</b> , 31, 1807716                     |
| Gold nanoparticles coated anodic aluminum oxide membrane | 63                    | 1.0                                                                  | <i>Sci. Adv.</i> <b>2016</b> , 2, 1501227                        |
| <b>CNF@RGO-90</b>                                        | 83                    | 1.47                                                                 | This work                                                        |

**Table S2.** The thermal conductivity of previously Reported Nano-carbon composite

| Sample                                   | Preparation method                                                                                     | Thermal conductivity                   | Ref.                                                                     |
|------------------------------------------|--------------------------------------------------------------------------------------------------------|----------------------------------------|--------------------------------------------------------------------------|
| Monolayer graphene                       | Chemical vapor deposition                                                                              | 5000 W/mK                              | <i>Nano Lett.</i> <b>2010</b> , <i>10</i> , 1645.                        |
| expanded graphite film                   | Annealing 800 °C for 1min, compression 20MP for 5 min                                                  | In-plan: 854 W/mK                      | <i>Carbon</i> <b>2019</b> , <i>153</i> , 565-574                         |
| Porous Graphene film                     | Chemical vapor deposition                                                                              | In-plan: 400 W/mK at room temperature  | <i>Adv. Mater.</i> <b>2015</b> , <i>27</i> , 4302–4307                   |
| Graphene paper                           | Ball milling in NMP (6 h), annealing at 2850 °C (2 h), mechanical compression (30 MPa)                 | In-plan: 1529 W/mK at room temperature | <i>Adv. Funct. Mater.</i> <b>2017</b> , <i>27</i> , 1700240              |
| Au Nano-particle decorated graphene film | Sonication in PEI/water (1 h), annealing at 340 °C (2 h), mechanical compression (100 psi, 1 h)        | In-plan: 200 W/mK                      | <i>ACS Appl. Mater. Interfaces</i> <b>2011</b> , <i>3</i> , 1325–1332    |
| G-Graphene film                          | Sonication in nitric acid and sulfuric acid (72 h), annealing at 1060 °C (2 h)                         | In-plan: 220 W/mK at room temperature  | <i>ACS Appl. Mater. Interfaces</i> <b>2014</b> , <i>6</i> , 15026–15032. |
| RGO films                                | GO film was fabricated by 3D print, annealing at 1000 K and gradually Joule-heated to 2000 K or 3000 K | In-plan: 118 W/mK at room temperature  | <i>Adv. Funct. Mater.</i> <b>2019</b> , <i>29</i> , 1901388              |
| Graphite/Copper composites               | Mixing the powder of Copper and Graphite for 6 h, heat compression under 900°C, 75 Mpa..               | In-plan: 456 W/mK at room temperature  | <i>Carbon</i> <b>2019</b> , <i>149</i> , 152-164                         |
| <b>CNF@RGO-90</b>                        | Filtration-assisted self-assembly: sonication in water at 80 °C (5h), and filtration fabrication       | In-plan: 614-1238 W/mK within 25-80°C  | This work                                                                |

**Table S3.** The densities and specific surface areas of the previously reported compact nanocarbon-based materials in comparison with the as-prepared compact thin films.

| Sample                                 | Density (g cm <sup>-3</sup> ) | Specifial area (m <sup>2</sup> g <sup>-1</sup> ) | Performance <sup>a</sup>                            | Ref.                                                      |
|----------------------------------------|-------------------------------|--------------------------------------------------|-----------------------------------------------------|-----------------------------------------------------------|
| Ac/Graphene Hydrogel                   | 0.71                          | 1402                                             | 98 Wh L <sup>-1</sup>                               | <i>Energy Storage Materials</i> <b>2019</b> , 18, 13      |
| Graphene Hydrogel                      | 0.6-1.6                       | 370-1000                                         | 65Wh L <sup>-1</sup>                                | <i>Energy Environ. Sci.</i> <b>2016</b> , 9 , 3135        |
| High-density Holey Graphite Nanosheets | 0.7-1.6                       | 287-370                                          | 384 F cm <sup>-3</sup>                              | <i>Nanoscale Horiz.</i> <b>2019</b> , 4, 526              |
| 3D graphene Hydrogel                   | 1.5                           | 347                                              | 165 F cm <sup>-3</sup>                              | <i>J. Mater. Chem. A</i> <b>2019</b> , 7, 12691           |
| PSS:PEDOT/graphene film                | 1.25-0.7                      | ---                                              | 203 F cm <sup>-3</sup>                              | <i>Energy Environ. Sci.</i> <b>2018</b> , 11, 559         |
| CNT/Polyaniline Hydrogel               | 1.19                          | ---                                              | 632 F cm <sup>-3</sup>                              | <i>ACS Appl. Mater. Interfaces</i> <b>2016</b> , 8, 34027 |
| Organic molecules/graphene network     | 1.38                          | ---                                              | 633Fcm <sup>-3</sup> /41 Wh L <sup>-1</sup>         | <i>J. Mater. Chem. A</i> <b>2020</b> , 8, 461             |
| Porous carbon/CNT/Graphene nanosheets  | 1.39                          | 277                                              | 877 F cm <sup>-3</sup> /27.51 WhL <sup>-1</sup>     | <i>Nanoscale</i> <b>2018</b> ,10, 15229                   |
| PANI/graphene composite                | 1.4                           | 150                                              | 650 F cm <sup>-3</sup> / 44WhL <sup>-1</sup>        | <i>Nano Energy</i> <b>2017</b> , 36, 349                  |
| High Density Porous Graphene Macroform | 1.05                          | ---                                              | 141 mA h cm <sup>-3</sup>                           | <i>Adv. Energy Mater.</i> <b>2018</b> , 8, 1702395        |
| <b>CNF@RGO-n</b>                       | 0.9-1.6                       | 40-126                                           | 1238 W /mK, 1.47 kg m <sup>-2</sup> h <sup>-1</sup> | This work                                                 |

<sup>a</sup> The previously reported compact carbon composites were mainly used as the electrode materials for energy storage, associated with their high electric conductivities. While, the as-prepare compact thin films exhibit a dual-role function of thermal management and water pumping, as demonstrated by their excellent performance in solar-steam generation.
